# Supplementary material for: Perceptions and use of traditional African medicine in Lubumbashi, Haut-Katanga province (DR Congo): A cross-sectional study
Source: PubMed Central journal article supplement (PMC9578634; doi:10.1371/journal.pone.0276325), 2022-10-18
Supplement: pone.0276325.s001.pdf [file pone.0276325.s001.pdf]

## *Interview protocol*

### **Investigation about the perception and use of traditional African medicine in Lubumbashi**

The main objective of this survey is to determine the percentage of the population of Lubumbashi that uses traditional medicine.

#### **Questionnaire**

1. Do you know traditional medicine?    Yes                       No
2. What is traditional medicine according to you :.....
3. Have you ever resorted to traditional medicine?    Yes                                             No  
If so, for what disease and under what circumstances? :.....
4. Do you prefer traditional medicine?                                                No  
What for? .....
5. In which case you cannot resort to traditional medicine? :.....
6. How many times have you ever resorted to traditional medicine? :.....
7. Who did you get the care you needed (no name)? .....
8. With which product did he care for you? :.....  
How did you use it (route of administration):.....
9. How did you choose your caregiver? :.....
10. How much was the cost of your treatment? :.....
11. How did you identify (locate) your caregiver? :.....
12. What did you pay your bill with (caregiver fees) :.....
13. Have you ever treated yourself? :    Yes                       No   
With what recipe (drugs)? :.....  
For which disease? :.....  
How did you take your medicine? :.....
14. What fear do you have when resorting to traditional medicine? :.....
15. What fear do you have when resorting to modern medicine? .....
16. 16. How did your caregiver discover your disease? :.....
17. At what precise point in the disease did you resort to traditional medicine: before, during or after resorting to modern medicine? :.....
18. Did you know that it is dangerous to mix the two treatments (traditional medicine / modern medicine)?    Yes                       No
19. What danger do you know exactly? :.....
20. Does your spouse agree to use traditional medicine?    Yes                                             No

21. Your study level: No studies  Primary  Secondary  Academic
22. How many times have you resorted to modern medicine in last year? :.....
23. For which disease did you resort to modern medicine in last year? : .....
24. Do you think traditional medicine is effective? Yes  No
25. Have you ever been recommended to use traditional medicine? : Yes  No
- If so, by whom?.....
26. Have you ever recommended someone to use Traditional Medicine? Yes  No
- If yes, who is it: A family member  A friend  A stranger
27. What do you do in case of failure in modern medicine? :.....
28. What do you do in case of failure in traditional medicine? :.....
29. Your residential address (district & commune):.....
30. Gender :.....; Age :.....(Years); Marital status :.....; Tribe:.....
31. Your religion:..... Mother tongue:.....
32. Languages spoken:.....
33. Residence type: Urban  Peri-urban
34. What is your profession or occupation?.....
35. How long have you lived in Lubumbashi? .....
36. What is your monthly income? .....
37. What more can you add? .....
